1 **Structural color in *Junonia* butterflies evolves by tuning scale lamina thickness**

2  
3

4 **Author affiliations:**

5 Rachel C. Thayer<sup>a</sup> ORCID: 0000-0001-5856-7614

6 Frances I. Allen<sup>b,c</sup> ORCID: 0000-0002-0311-8624

7 Nipam H. Patel<sup>a,d</sup> ORCID: 0000-0003-4328-654X

8

9 <sup>a</sup>Department of Integrative Biology, UC Berkeley, Berkeley, CA 94720

10 <sup>b</sup>Department of Materials Science and Engineering, UC Berkeley, Berkeley, CA 94720

11 <sup>c</sup>California Institute for Quantitative Biosciences, UC Berkeley, Berkeley, CA 94720

12 <sup>d</sup>Marine Biological Laboratory, Woods Hole, MA, 02543

13

14 **Corresponding author:** Rachel C. Thayer, University of California, Berkeley. Dept. of  
15 Integrative Biology. thayerr(at)berkeley(dot)edu.

16

17

18 **Abstract**

19

20 In diverse organisms, nanostructures that coherently scatter light create structural color, but  
21 how such structures are built remains mysterious. We investigate the evolution and genetic  
22 regulation of butterfly scale laminae, which are simple photonic nanostructures. In a lineage of  
23 buckeye butterflies artificially selected for blue wing color, we found that thickened laminae  
24 caused a color shift from brown to blue. Deletion of the *optix* wing patterning gene also altered  
25 color via lamina thickening, revealing shared genetic regulation of pigments and lamina  
26 thickness. Finally, we show how lamina thickness variation contributes to the color diversity that  
27 distinguishes sexes and species throughout the genus *Junonia*. Thus, quantitatively tuning one  
28 dimension of scale architecture facilitates both the microevolution and macroevolution of a  
29 broad spectrum of hues. Because the lamina is an intrinsic component of typical butterfly  
30 scales, our findings suggest that tuning lamina thickness is a readily accessible mechanism to  
31 create structural color across the Lepidoptera.

## 32 Introduction

33

34 Structural colors are both visually delightful and abundant in nature. Organisms deploy  
35 structural colors to display hues for which they lack pigments (frequently blues and greens), to  
36 create specific optical effects such as iridescence or light polarization, and to mediate ecological  
37 interactions, including intraspecific signaling and camouflage. Unlike pigmentary color, which is  
38 caused by molecules that selectively absorb certain wavelengths of light, structural colors result  
39 from the constructive and destructive interference of light as it interacts with nanoscale,  
40 precisely-shaped physical structures that are made of a high refractive index material (e.g.  
41 keratin, chitin, or cellulose).

42

43 Despite the clear importance of structural color for living systems, the biological production of  
44 structural colors has long eluded characterization [1]. Many experimental techniques depend on  
45 harnessing variation to dissect biological processes, but photonic structures are so small that  
46 quantitatively measuring variation in their dimensions is technically demanding, especially for  
47 high-throughput sampling, detecting subtle variation that may segregate within populations, or  
48 analyzing over developmental time *in vivo*. The color itself is easier to quantify, but has limited  
49 utility as a proxy for nanostructural dimensions, since structural colors and pigments often co-  
50 occur and covary. While recent studies [2-4] have made early headway toward describing  
51 genetic regulation of structural colors, much work remains to decipher the evolutionary,  
52 developmental, and genetic bases of structural coloration, and lab-tractable systems with  
53 intraspecific variation in structural coloration are needed. We present a promising system, the  
54 butterfly genus *Junonia*, with extensive variation in a simple structural color, and show how  
55 structural simplicity is a tactical advantage when seeking to unravel mechanisms for the  
56 biological production of nanostructures.

57

58 In butterflies, photonic nanostructures occur within the architecture of scales. Scales are the  
59 fundamental coloration unit on butterfly wings and have a Bauplan consisting of a grid of ridges  
60 and ribs, supported by a lower lamina that is a simple plane (Fig. 1A). Scales are composed of  
61 chitin and may also have embedded pigments. Intricate architecture and a high refractive index  
62 make scales a pliable substrate for photonic innovations, and indeed scales have been  
63 evolutionarily elaborated in many ways for impressive optical effects [5]. Even the simplest  
64 butterfly scales can produce structural color, via the lower lamina acting as a thin film reflector.  
65 Thin films are the simplest photonic structure and consist of a layer of high refractive index  
66 material, on the order of hundreds of nanometers thick, surrounded by a material with a  
67 contrasting refractive index, i.e. air (Fig. 1B). Light is reflected from each surface of the film, and  
68 these two reflections interfere with each other. If the two reflections remain in phase, which  
69 depends on the extra distance traveled through the film and the wavelength, then they interfere  
70 constructively to produce observable color [6,7]. Conversely, wavelengths (colors) that undergo  
71 destructive interference have decreased brightness.

72

73 While it is known that the thickness of the lower lamina is one parameter that controls structural  
74 color wavelength [8] and that thickness can respond to artificial selection in the laboratory [9], it  
75 is not known how general this mechanism is in natural evolution. It is also unknown how lamina

76 structural colors are genetically regulated and whether any recognized butterfly wing patterning  
77 genes regulate lamina thickness. Here, we use mutants with deletions in the *optix* wing  
78 patterning gene, artificial selection on wing color, and genus-wide wing color variation to test the  
79 role of lamina thickness in generating butterfly color. We show that butterflies in the genus  
80 *Junonia* thoroughly exploit the relationship between film thickness and color, using the thin films  
81 necessarily present in their scales to produce a broad spectrum of hues by tuning lamina  
82 thickness. These lamina colors work in tandem with pigments to define the wing pattern  
83 elements that distinguish populations, sexes, and species, indicating that the ability to vary  
84 lamina thickness has been an important microevolutionary and macroevolutionary tool in this  
85 group, and likely in butterflies more broadly.

86

## 87 **Results**

88

### 89 ***Artificial selection for blue wing color increases lamina thickness***

90 Here we describe a novel instance of rapid, artificially selected color shift from brown to blue  
91 wing color in *J. coenia* buckeye butterflies (Fig 1D-E) and identify the structural changes that  
92 enabled the color shift. Edith Smith, a private butterfly breeder, began selectively mating  
93 buckeyes with a few blue scales on the costal margin of the dorsal forewing (E. Smith, personal  
94 communication, Sep. 2014). After five months of selective breeding, blue spread to the dorsal  
95 hindwing of some individuals. By eight months, there was a noticeable increase in blue surface  
96 area, and within roughly 12 months (on the order of 12 generations), most butterflies in the  
97 breeding colony were visibly blue over the majority of their dorsal wing surface. On the forewing,  
98 areas proximal to M1 were visibly blue, except the discal bars (Fig. S1). On the hindwing, blue  
99 shift did not include the distal-most wing pattern elements, i.e. E1-EIII and eyespots. At its  
100 strongest, the phenotype may include blue scales cupping the posterior forewing eyespot and/or  
101 a blue sheen in all distal elements of the forewing. Smith maintained the blue colony for several  
102 years, introgressing a few progeny from crosses to wild-caught buckeyes about once per year to  
103 maintain genetic diversity. Over time, she noted the emergence of a variety of short-wavelength  
104 colors, ranging from purple to green. Two years after focused selection, she estimated that the  
105 population was 85% blue, 8% green, 2% purple, and 5% brown. Like many familiar examples of  
106 human selection (e.g. domesticated animals, crop plants), outcomes are informative even  
107 without complete experimental documentation of the selective process [10,11]. These selected  
108 blue buckeyes provide a previously unexploited opportunity to study structural color. They  
109 demonstrate rapid and extensive evolutionary color change, and are a stark contrast to wild-  
110 type brown populations with which they are still interfertile. Conveniently, the artificially selected  
111 taxon, *J. coenia*, is a recognized model species for butterfly developmental genetics [12,13].  
112 The selected blue individuals resemble naturally evolved color variants in the sister species, *J.*  
113 *evarete* (Fig. 1F), and offer a useful comparison to a previously reported artificial selection  
114 experiment in butterflies [9].

115

116 To pinpoint the cause of blueness in artificially selected butterflies, we characterized cover  
117 scales from the dorsal hindwing (Fig. 2A-D). Butterfly wings have two classes of scales  
118 arranged in alternating rows that form two layers: superficial cover scales and underlying ground  
119 scales. Cover and ground scales frequently have contrasting size, shape, and color, and their

120 juxtaposition can be important for wing color [8]. When isolated and laid in the abwing  
121 orientation they occupy on the wing, cover scales were blue (Fig. 2B). However, when flipped  
122 over and viewed in adwing orientation, which exposes only the lower lamina, scales appeared  
123 more brightly blue and iridescence was more apparent (Fig. 2B', 2D). We tested whether the  
124 blue was structural rather than pigment-based by immersing the full scale in oil with a refractive  
125 index matched to that of chitin (Fig. 2B''). Index-matching eliminates the possibility of reflection  
126 and structural color, leaving only pigment-based coloration. We measured the scale's  
127 absorption spectrum under these conditions (Fig. 3A), which revealed that blue scales did have  
128 some pigment, presumably a brown ommochrome [14], but this pigment cannot account for  
129 blueness. The pigment was located in the scale ridges (Fig. S2 B). Lepidopteran structural  
130 colors may occur in the lamina, lumen, ridges, or cross-ribs. To isolate which of these features  
131 had the nanostructure responsible for blue structural color, we dissected the scales (Fig. 2B'',  
132 Fig. S2 A). After removing all other scale components, we found that the bare lower lamina was  
133 sufficient for blue structural color. We also examined regions with all scale components except  
134 the lamina and found that these pieces of lamina-less scale were not blue (Fig. S2 C). We thus  
135 focused on investigating nanostructure in the lamina. To discern between a single or multilayer  
136 lamina and take precise measurements, we cross-sectioned the lamina and viewed it with  
137 Helium Ion Microscopy (HIM) (Fig. 2C). HIM imaging indicated the lower lamina was a simple  
138 monolayer of chitin with a thickness of  $187 \pm 13$  nm (SD, Fig. 1C), which is a reasonable  
139 thickness to reflect blue as a dielectric thin film [8].

140  
141 We next investigated whether ground scales also contributed to blueness after artificial  
142 selection. In artificially selected buckeyes, the ground scales generally had similar architecture  
143 to the cover scales, but with less uniform lamina color: ground scales exhibited a color gradient  
144 from the stalk outward (Fig. 4A-B'). Correspondingly, ground scales had a similar mean  
145 thickness but more variability than cover scales ( $190 \pm 29$  nm). Ground scales were much more  
146 heavily pigmented than cover scales (Fig. 3B, Fig. 4B''), such that the abwing surface was black  
147 (Fig. 4B). The extra pigmentation in ground scales enhances spectral purity by absorbing light  
148 transmitted through the cover scales, thus reducing backscatter and making the observed blue  
149 color more saturated (similar to [15]). We conclude that cover scale laminae are the major  
150 source of blueness in artificially selected buckeye butterflies, while melanic ground scales  
151 secondarily enhance spectral purity.

152  
153 For comparison, we tested the source of color in wild-type brown scales and found that they  
154 also had structural color (Fig. 2E-H). Brown cover scales had the same general architecture and  
155 no more brown pigment than did blue cover scales (Fig. 3A, Mann-Whitney *U*, Table S1). The  
156 salient difference was lamina thickness: brown scales were markedly thinner, measuring only  
157  $109 \pm 12$  nm (Analysis of Variance (ANOVA),  $p < 2 \times 10^{-16}$ , Fig. 1C, Fig. 2G). A 109 nm chitin thin  
158 film reflects a desaturated golden color due to reflectance of many long wavelengths. This  
159 golden structural color was confirmed by the adwing scale color, the color of the bare lamina in  
160 dissected scales, and the adwing reflectance spectra of brown scales (Fig. 2F'-F'', H).  
161 Therefore, though brown coloration is often attributed to pigmentation, wild-type brown cover  
162 scales also had a structural color, one simply tuned to enhance different wavelengths.

163

164 Artificial selection also altered the absorption and lamina thickness of the ground scales (Fig.  
165 4A-D). The wild-type (brown) ground scales were thinner than the blue ground scales ( $151 \pm 30$   
166 nm, ANOVA,  $p = 2 \times 10^{-6}$ , Fig. 1C). However, the mean difference was less extreme than in cover  
167 scales: blue cover scales were on average 78 nm thicker than wild-type, while blue ground  
168 scales were on average 39 nm thicker. Selected ground scales were markedly more absorbing  
169 than wild-type ground scales (Fig. 3B, Mann-Whitney  $U$ , Table S1), which is consistent with  
170 increased pigmentation that decreases backscatter in blue wing regions.

171  
172 We conclude that the artificially selected buckeye butterflies rapidly evolved blue wing color via  
173 a 71% mean increase in lamina thickness in cover scales and a similar but less pronounced  
174 effect in ground scales. The effect was further amplified by increased pigmentation in ground  
175 scales, but without removing brown pigment from cover scales. Our results show that structural  
176 color can evolve quickly by modifying one dimension of an existing structure, and the process is  
177 facilitated by the initial presence of previously unrecognized structural color in wild-type brown *J.*  
178 *coenia*.

179  
180 Since the artificially selected *J. coenia* wing pattern resembles natural iridescent variants in the  
181 sister species, *J. evarete* (Fig. 1F), we obtained hindwings of brown and blue *J. evarete*  
182 individuals from different geographic locations and tested whether blue cover scales in this  
183 species were also associated with increased lamina thickness (Fig. 2I-P). We found that the  
184 same mechanism explained color differences between geographic color variants: blue scales  
185 had 78% thicker scale laminae (blue  $199 \pm 14$  nm; brown  $112 \pm 13$  nm; ANOVA,  $p < 2 \times 10^{-16}$ ,  
186 Fig. 1C) and no appreciable difference in pigmentation, compared to brown individuals (Fig. 3C,  
187 Mann-Whitney  $U$ , Table S1). Furthermore, in blue *J. evarete*, the ground scales were darkly  
188 pigmented. Thus, the artificially selected blue buckeyes faithfully recapitulate natural variation at  
189 the level of scale coloration between sister species.

190  
191 ***Color phenotypes in optix mutants include altered lamina thickness***  
192 Recently, Zhang *et al.* used CRISPR/Cas9 to generate mosaic knockout mutants of *optix* [16], a  
193 gene previously associated with pigment variation in butterfly wings [17]. Surprisingly, in  
194 addition to pigmentation phenotypes, *optix* mutants in *J. coenia* gained blue iridescence in wing  
195 scales. We tested phenotypically mutant blue scales from mosaic butterflies to determine what  
196 structural or pigmentary changes created the color change (Fig. 2Q-T). Where blue scales  
197 occurred in the background region of the dorsal wing, blueness was due to similar factors as  
198 identified in artificially selected buckeyes. Lamina thickness of blue cover scales was  
199 substantially increased compared to wild-type brown scales ( $212 \pm 11$  nm, ANOVA,  $p < 2 \times 10^{-16}$ ,  
200 Fig. 1C). The concentration of brown pigment in the cover scales was significantly reduced  
201 relative to wild-type scales within the same mosaic wing (Fig 5A, Mann-Whitney  $U$ , Table S1)  
202 but comparable to selected animals (Fig. 3A, Table S1). Ground scales (Fig. 4E-F") were  
203 likewise similar to those of selected blue animals, having thick and variable laminae ( $199 \pm 31$   
204 nm, ANOVA,  $p = 5 \times 10^{-5}$  versus wild-type.  $p = 0.36$  versus selected, Fig. 1C) and significantly  
205 increased pigmentation (Fig. 5B, Mann-Whitney  $U$ , Table S1). Overall, blue scale identity in  
206 *optix* mutants was caused by similar mechanisms as artificially selected blue.

207



208 *optix* mutant phenotypes also affected structural colors and pigments differently across wing  
209 pattern elements. As originally postulated [16], excess melanin was produced in some ventral  
210 wing regions (Fig. 6A-D, Fig. 5C). We also observed regions where both pigment and structure  
211 were dramatically changed. For example, discal bars on the dorsal forewing, which are normally  
212 orange, gained blue scales through both converting lamina structural color to blue and replacing  
213 orange with brown pigment (Fig. 6E-H, Fig. 5D). The kinds of pigmentation effects were diverse:  
214 *optix* mutation increased the quantity (Fig. 5B, C), decreased the quantity (Fig. 5A), or switched  
215 the identity (Fig. 5D) of the pigment in different scales (Mann-Whitney *U*, Table S1). Because  
216 the butterflies were mosaic mutants, some of this phenotypic variability could be due to  
217 genotypic differences between clones (i.e. mono- versus biallelic gene deletion, as well as the  
218 exact size of the deletion) [16]. However, much of the variation in outcome could also be  
219 observed within single clones that spanned multiple wing pattern elements (defined by the  
220 Nymphalid ground plan [18], Fig. S1), suggesting that the patterning roles of *optix* are quite  
221 context specific.

222  
223 In summary, *optix* knockout can have varied effects in a single scale by altering pigmentation,  
224 nanostructures, or both. These findings are consistent with *optix*'s described role as a  
225 developmental patterning gene that determines gross switches between discrete scale fates,  
226 and which, directly or indirectly, can regulate diverse downstream factors [19]. Since appropriate  
227 coloration critically depends on the proper combination of pigment and structural colors in both  
228 cover and ground scales (e.g. [20,21]), it is of particular interest that *optix* can regulate all of  
229 these components simultaneously. *optix* mosaic knockout mutants demonstrate that lamina  
230 thickness can be experimentally perturbed and highlight a multifunctional candidate genetic  
231 pathway for coordinated color evolution.

### 232 233 ***Lamina thickness consistently predicts structural color wavelength***

234 Relatives of *J. coenia* exhibit extensive color and pattern diversity, and blue structural colors in  
235 particular show patterns of variation that hint at ecological relevance (e.g. sexual dichromatism,  
236 seasonal polyphenism) (Fig. 7A). To assess the importance of lamina thickness variation in  
237 macroevolutionary color diversity, we sampled cover scales from nine species in the genus  
238 *Junonia* and a tenth species, *Precis octavia*, which belongs to the tribe Junoniini and exhibits  
239 seasonally polyphenic wing coloration. We prioritized large pattern elements that distinguish  
240 color forms within species. We compared scales using optical imaging, immersion index-  
241 matching, spectrophotometry, and Helium Ion Microscopy. All scales sampled had typical  
242 Nymphalid scale structure with a single plane of chitin forming the lower lamina.

243  
244 We tested whether the relationship between lamina thickness and color that we observed in  
245 experimental contexts applies more broadly. We sought to address two questions: First, does  
246 lamina thickness reliably predict lamina color, as measured from the adwing surface? While it is  
247 known that the thickness of a dielectric film controls the film's reflectance, other variables such  
248 as refractive index, surface roughness, and pigmentation within the film also factor into  
249 reflectance, and these could plausibly vary among taxa. Second, how variable is lamina  
250 thickness? What range of thicknesses occur, and is there evidence for either quantized or  
251 continuous thickness variation? To address these questions, we measured reflectance spectra

252 from the adwing surface of disarticulated cover scales from the 23 wing regions indicated in Fig.  
253 7A. We then cross-sectioned scales, imaged with HIM, and measured thickness.

254  
255 We found that lamina thickness varied continuously between 90-260 nm, indicating that all  
256 thicknesses over a more than 2.5-fold range are accessible (Fig. 8A). To better visualize the  
257 relationship between thickness and lamina color, we clustered similar samples into five color  
258 groups (Methods). Lamina colors in these groups could be described as gold, indigo, blue, and  
259 green, with a fifth variable group that included magenta, copper, and reddish colored scales  
260 (labeled as “red” in Fig. 8). Thickness differed significantly between all color group pairwise  
261 comparisons (Fig. 8A, ANOVA:  $p < 2 \times 10^{-16}$ , with *post hoc* Tukey’s Honestly Significant  
262 Difference test:  $p < 2 \times 10^{-6}$  for all pairwise comparisons). The color groups were also associated  
263 with different reflectance profiles (Fig. 8B). In some cases, we obtained variable measures  
264 within individual specimens, which reflects biological color variation between adjacent scales, as  
265 well as varying color within individual scale laminae along their proximal-distal and lateral axes.  
266 A particularly striking example of the latter came from *J. atlites*. While the wing appeared light  
267 grey, at higher magnification individual scales could be seen to be multicolored (Fig. 7G’), and  
268 thickness measures from *J. atlites* overlapped the ranges of all color groups (Fig. 8A, see  
269 further analysis below).

270  
271 Lamina thickness had a consistent relationship with adwing scale reflectance for the taxa and  
272 color range we sampled. The order of color shift as lamina thickness increased followed  
273 Newton’s series, which is the characteristic color sequence for thin films [6,23]. This sequence  
274 can be understood in terms of an oscillating thin film reflectance function, which shifts toward  
275 longer wavelengths as film thickness increases (Fig. 8C-G). The thinnest films appeared gold  
276 due to reflectance of all the longer wavelengths (Fig. 8C). In mid-thickness laminae, a mix of two  
277 oscillations determined color: reflectance of the first oscillation was shifted toward far red  
278 wavelengths, while a second reflectance peak rose in the ultraviolet (Fig. 8D). Visible  
279 reflectance of thicker laminae was dominated by the peak of the second oscillation as it moved  
280 from indigo to green (Fig. 8E-G). That the trend between thickness and reflectance holds  
281 broadly suggests that color changes in *Junonia* butterfly scales have recurrently evolved via  
282 lamina thickness adjustments. Moreover, the consistency of the relationship between thickness  
283 and reflectance is useful. For example, structural variation could be rapidly surveyed by  
284 extracting fitted thickness estimates from reflectance measurements, a much less laborious  
285 process than sectioning for electron microscopy.

### 286 287 ***Lamina structural color influences wing color throughout the genus Junonia***

288 We next tested whether the extensive variation in lamina structural color among *Junonia*  
289 butterflies, explained by lamina thickness, also drives variation in overall wing color. An  
290 alternative hypothesis would be that composite wing color is usually dominated by pigmentation,  
291 particularly by pigments distributed on the outward-facing abwing surfaces of cover scales,  
292 above the lamina thin film. We measured pigmentation in cover scales from the same regions  
293 (Fig. 7A) to test the relative importance of pigments and lamina structural colors for wing color.  
294 (Structural colors and pigments are listed per each specimen in Table S2 and representative  
295 examples are shown in Fig. 7B-M”.)

296 Pigmentation was highly variable among *Junonia* species (Fig. 7B-M", Fig. 9, Table S2). This  
297 included marked differences in pigmentation between regions of a single wing (e.g. yellow and  
298 blue regions in *J. hierta*, Fig. 7B-E", 9A) and also variation between color forms and species  
299 throughout the genus (e.g. between sexes in *J. orithya*, Fig. 9C, and seasonal forms in *P.*  
300 *octavia* Fig. 7H-M", 9B). Absorbance spectra varied in both shape and magnitude. Variation in  
301 magnitude, such as between the red band and the wet season morph of *P. octavia* (Fig. 9B),  
302 represents differences in pigment abundance. We also observed distinct absorbance spectral  
303 shapes, which can indicate the identity of the pigment (for example, contrast the spectral shape  
304 of the yellow pigment in *J. hierta*, Fig. 9A, versus red pigment in *P. octavia*, Fig. 9B, and brown  
305 pigment in *J. orithya*, Fig. 9C).

306  
307 Notwithstanding the clear importance of pigmentation among *Junonia* butterflies, pigment  
308 variation was insufficient to explain the breadth of wing color diversity, and lamina structural  
309 colors made up the shortfall. The importance of lamina structural color was most obvious in  
310 scales that entirely lacked pigments. For example, the blue basal aura regions of male *J.*  
311 *westermanni*, *J. hierta*, and *J. oenone* wings had unpigmented cover scales with structurally  
312 blue laminae (Fig. 7B-C", Fig. 9A). Most of the pigmentless scales we sampled were blue, with  
313 the notable exception of *J. atlites* scales (Fig. 7F-G", Fig. 9D). These scales had rainbow  
314 gradient laminae, which presumably create the overall light grey by additive color mixing [24]. *J.*  
315 *atlites* demonstrates that lamina structural color can fundamentally drive wing color even in  
316 neutrally colored wing regions that are not obviously iridescent, and also that thickness can be  
317 patterned at fine spatial resolution within a single lamina.

318  
319 In most wing regions, color was determined by the interaction of both lamina structure and  
320 pigments. For example, in the cover scales of *J. hierta* (Fig. 7D-E", Fig. 9A), the yellow lamina  
321 structural color and yellow pigment were mutually reinforcing, with the lamina sensibly reflecting  
322 wavelengths that the pigment does not absorb. Other examples help delineate how much  
323 pigment is required to overpower the lamina color. In blue *J. evarete*, pigments in the cover  
324 scale ridges absorbed approximately 0.2 AU (Absorbance Units, i.e. 37% of light not  
325 transmitted, Fig. 3C) of the blue wavelengths that the lamina reflected most brightly (Fig. 2L).  
326 With this ratio, wing hue was still driven by the lamina structural color. The cover scales of *J.*  
327 *orithya* were similar (Fig. 9C), having a neutral dark pigment (i.e. a pigment that absorbs all  
328 visible wavelengths) in the scale ridges. Perhaps dark pigment in the ridges functions like a  
329 Venetian blind to limit iridescence, so that at high viewing angles, where iridescence would be  
330 most pronounced, light from the lamina is quenched.

331  
332 Because of their range of pigment concentrations, *P. octavia* specimens were also useful to test  
333 the tradeoff between pigment abundance and lamina color influence. When viewed at high  
334 resolution, scales from the wet season morph of *P. octavia* contained red pigment in the ridges  
335 and ribs (max absorbance  $0.12 \pm 0.02$ , Fig. 7K,K', Fig. 9B), while reflected light from the blue  
336 lamina spilled through the windows between ridges. Viewed macroscopically, this combination  
337 made a lightly saturated red. To display a richly saturated red, much more pigment was  
338 required, as seen in the red band of the dry season morph (max absorbance  $0.38 \pm 0.04$ , Fig.  
339 9B, Fig. 7 L-M"). These reddest scales also had thinner, structurally magenta and copper



340 colored laminae that may further reinforce redness (Fig. 8A, Fig. 7M'). The concentration of red  
341 pigment was the most important driver of the color difference between *P. octavia* seasonal  
342 morphs. The blue and red morphs had only a subtle difference in lamina thickness (Fig. 8A),  
343 and the laminae of both were blue (Fig. 7 I', K'), but the blue morph lacked any red pigment (Fig.  
344 9B).

345  
346 Overall, *Junonia* wing color was determined by complex mix-and-matching of different lamina  
347 thicknesses and pigments. A thin film lower lamina was present in all scales, but its influence on  
348 wing color was adjusted by the amount and placement of pigment, especially in the upper  
349 surface of the scale. Pigments can mask lamina structural color at high enough density,  
350 depending on the placement and color of the pigment as well as the color of the lamina. In our  
351 tests, when pigmentation absorbed  $\leq 0.2$  AU of the relevant wavelengths, it did not cancel out  
352 lamina structural color.

353

### 354 **Comparison to thin film equation**

355 We compared our empirical data to Fresnel's classical thin film equations, which model the  
356 reflectance of an idealized dielectric thin film [7,25]. This model has previously been used to  
357 estimate the thickness of butterfly scale laminae based on their adwing reflectance spectra  
358 [8,21]. For each sample, we modeled the expected reflectance using our thickness  
359 measurements, and then compared to the measured reflectance spectra. We used 1.56 for the  
360 refractive index of chitin [26] and a maximal angle of illumination of  $30^\circ$  following [27] (because  
361 spectra were measured through an objective lens with a numerical aperture of 0.5). To account  
362 for measurement error, we modeled films over all thicknesses within one standard deviation of  
363 the measured mean per sample (red envelopes, Fig. S3 A). We also modeled films with  
364 Gaussian thickness distributions for each sample, following [15]. This model is analogous to a  
365 single uneven film with mean thickness and surface roughness defined by the measured  
366 thickness and sample standard deviation (solid red lines, Fig. S3 A).

367

368 We found that qualitatively the model describes the main behaviors of our data: reflectance  
369 oscillates with a given frequency and brightness, and the function shifts toward longer  
370 wavelengths as thickness increases. Quantitatively, mean maxima and minima in the  
371 reflectance function were offset laterally for every specimen, by about 40-80 nm, with the  
372 modeled curves blue-shifted relative to the observed. A similar blue shift has been reported in  
373 butterfly scale laminae before [9]. The comparison improves if we assume a higher refractive  
374 index or thickness. However, to align modeled and measured spectra would require either an  
375 impossibly high refractive index (around 1.75) or increased thickness outside the error range of  
376 our measures (20-25 nm thicker than mean measurements). Possibly the lateral offset is due to  
377 a combination of the former. Alternatively, these results could indicate that scales have  
378 additional properties not fully described by the model. There are a number of differences  
379 between the idealized film and real scales, including curvature of the film and possible  
380 birefringence of the ridges. The lamina itself may not necessarily have a uniform material  
381 composition or refractive index. For example, contrasting sublayers within the lamina (as in [28])  
382 could create extra reflective interfaces. Thus, our data are compatible with the expected

383 behaviors of thin films, but modeling the specific case of butterfly scale laminae with quantitative  
384 precision may require additional parameters or calibration to an empirical dataset.

385

## 386 **Discussion**

387 This study leverages the simplest photonic nanostructures, thin films, to interrogate the  
388 evolution and genetic regulation of structural color in *Junonia* butterfly scales. While there is a  
389 large body of literature attributing optical properties to various biological nanostructures, such  
390 claims commonly rest on correlation between mathematical models and spectral  
391 measurements. Here, we use two different experimental manipulations of the structure (artificial  
392 selection on wing color and knockout of the *optix* gene) in addition to broad interspecies  
393 comparisons to establish that lower lamina thickness quantitatively controls structural color  
394 wavelength in *Junonia* butterfly scales. The relationship between lamina thickness and  
395 wavelength holds over a wide range of thicknesses (90-260 nm) that generate Newton's color  
396 series for dielectric thin films. Moreover, lamina structural color is one important determinant of  
397 overall wing color, including in wing regions that also contain pigments. Lamina structural colors  
398 contribute to the color differences that distinguish sexes, species, seasonal variants, and  
399 selectively-bred lineages of *Junonia* butterflies, highlighting that quantitatively tuning lamina  
400 thickness is a vehicle for color evolution in both micro and macroevolutionary contexts.

401

402 Because the lower lamina is part of the typical architecture of butterfly scales, our findings have  
403 broad implications for future research on adult color in numerous butterfly taxa. Foundational  
404 literature drew a distinction between highly derived scales with vivid structural colors and  
405 "standard, undifferentiated scales," which conform to the butterfly scale Bauplan, have a simple  
406 monolayer lower lamina, and "are not truly iridescent, i.e., they do not produce brilliant structural  
407 colors" [29]. However, within the past ten years, individual examples of thin film interference  
408 from the lower lamina have emerged in diverse Lepidoptera, including in simple scales  
409 [8,9,15,21,28,30,31]. These newer descriptions and our thorough examination of many scales  
410 indicate two points: first, although thin films are indeed less brilliant than some other classes of  
411 Lepidopteran photonic structures (thin films only reflect around 20% of incident light), they are a  
412 consequential source of structural color. Second, thin films occur in many butterfly and moth  
413 lineages and likely arose early in Lepidopteran evolution. The lower lamina has a thin film  
414 morphology in all scales that resemble the scale Bauplan, meaning that reflectance from the  
415 lamina is the shared condition except where it is masked by either heavy pigmentation or a  
416 derived structure with higher optical contrast. Because butterflies commonly produce multiple  
417 lamina colors across wing pattern elements and scale types, it is probable that the  
418 developmental genetic networks for quantitatively varying lamina thickness are deeply  
419 conserved as well. Hence, it will be useful to report which lamina colors are present, in addition  
420 to identifying pigments, when describing butterfly colors.

421

422 Physical constraints inherent to thin film colors may help explain the division of color space  
423 between pigments and photonic structures. It is not well understood why certain hues seem to  
424 be more often produced by pigments while others are more often produced by structural colors  
425 (e.g. the abundance of blue structural colors but lack of blue pigments in birds [32] and the rarity  
426 of one class of red structural color in birds and beetles [33]). In *Junonia*, we show that by tuning

427 thickness, thin film laminae can produce nearly all the spectral colors (i.e. yellow, green, blue,  
428 indigo), and even light achromatic colors (e.g. light grey in *J. atlites*) via color mixing across a  
429 gradient. Yet thin films are fundamentally incapable of producing certain colors, notably dark  
430 brown, black, and pure red. The medium thickness films that most nearly approach red have  
431 inherently poor color properties due to the oscillating nature of the thin film reflectance function.  
432 Since the colors of mid-thickness films are a mix of two reflectance peaks (Fig. 8C), they are  
433 reddish but not pure or well-saturated, and are better described as copper, magenta, and  
434 purple. Further, mid-thickness films are not bright: they reflect less total visible light than other  
435 thicknesses we observed (compare Fig. 8D to 8C, E-G). By contrast, red, black, and brown are  
436 prevalent pigment colors in *Junonia*, making pigments and thin film structural colors  
437 complementary color palettes with little overlap. The optical limitations of thin films may have  
438 partially determined how pigment families and scale architecture evolved in early butterfly  
439 lineages, which in turn initialized whether pigments or structures provide the most accessible  
440 route to evolve specific hues during subsequent diversification.

441  
442 Our findings uncover a link between artificially selectable responses in lamina thickness and  
443 natural butterfly color variation, and expand on a previous artificial selection study on butterfly  
444 wing color [9]. In both *J. coenia* and *B. anynana*, color shift was accomplished by modifying the  
445 dimension of an existing structure, the lower lamina, with pigmentation being less important.  
446 Since the selected taxa diverged 78 million years ago [34] this similarity may be informative  
447 about evolvability in nymphalid butterflies generally. However, artificial selection in *B. anynana*  
448 primarily increased thickness in the obscured layer of ground scales, which can only weakly  
449 influence color, whereas *Bicyclus* species with naturally evolved violet wing color have violet  
450 thin films in their cover scales. In our study, artificial selection continued longer (12 vs. 6  
451 generations) and elicited a more extreme response (71% vs. 46% increase in lamina thickness).  
452 Moreover, in *J. coenia*, we show that lamina thickness increased in the cover scales and fully  
453 recapitulated the naturally evolved mechanism of structural color in the sister species *J. evarete*.  
454 The thickness increases caused a stark wing color change plainly visible by eye, with  
455 appropriate wing patterning that also resembled *J. evarete* (thickened blue scales filled the  
456 background dorsal wing, while eyespots, distal pattern elements, and the ventral wing were  
457 unaffected). Our results robustly connect a rapid microevolutionary process to  
458 macroevolutionary diversity.

459  
460 By using butterflies with CRISPR/Cas9-generated knockout of the *optix* gene, we are able to  
461 provide insight into the genetic regulation of lamina thin films. It was previously known that the  
462 *optix* wing patterning gene can regulate a switch between wild-type brown and blue iridescent  
463 wing color in *J. coenia* [16], but the mechanistic basis for the color switch remained unknown.  
464 Specifically, it was unclear whether *optix* regulated scale structure itself, or whether *optix*  
465 deletion merely caused the loss of brown pigment, thus unveiling a pre-existing iridescent  
466 structure. Here, we show explicitly that in certain wing regions and scale types, *optix* deletion  
467 substantially increases lamina thickness. Our findings also amend the earlier conclusion that  
468 *optix* represses structural coloration in *J. coenia* [16]. Rather, by regulating lamina thickness,  
469 *optix* regulates the wavelength of a photonic structure that exists in both wild types and mutants.  
470 This distinction has implications for the likely identities and behavior of downstream genetic

471 factors, as well as the developmental basis of mutant blue coloration. For example, rather than  
472 preventing a cascade of downstream genes from acting to erect a photonic structure *de novo*,  
473 *optix* may subtly regulate the expression of a gene or genes that directly regulate lamina  
474 thickness, such as chitin synthase. Additionally, we uncover disparate effects of *optix* deletion  
475 on pigmentation, including promoting, suppressing, and switching the identity of pigments in  
476 different scale types. In aggregate, these results show that *optix*'s functions in *J. coenia* are  
477 highly context specific, depending on both wing region and scale type (i.e. ground or cover  
478 scale). Moreover, because *optix* can regulate both pigmentary and structural color, the *optix*  
479 pathway is an especially interesting candidate for coordinated color evolution, and further work  
480 on the detailed regulation of *optix* and its downstream targets is called for.

481  
482 In summary, thin film reflectors, a morphologically simple class of photonic structures, are  
483 experimentally manipulable and broadly employed in the lower lamina of *Junonia* butterfly wing  
484 scales. Lamina thickness explains variation in structural color wavelength, responds to selection  
485 on wing color, and is regulated by the *optix* wing patterning gene. Tuning lamina thickness  
486 facilitates both microevolutionary and macroevolutionary shifts in wing color patterning  
487 throughout the genus *Junonia*, making the buckeye butterflies a promising study system with  
488 which to decipher the genetic and developmental origins of structural color.

489  
490

## 491 **Materials and Methods**

### 492 *Butterfly specimens*

493 Reared *J. coenia* were fed fresh *Plantago lanceolata* or artificial diet (Southland Products, Lake  
494 Village, AK) as larvae and kept at 27-30 °C on a 16/8 hour day/night cycle. Artificially selected  
495 blue *J. coenia* were purchased as larvae from Shady Oak Butterfly Farm in 2014 (Brooker, FL).  
496 Wild-type *J. coenia* were from an established laboratory colony, originally derived from females  
497 collected in Durham, North Carolina [35] (for the comparisons to both *optix* mutant and selected  
498 butterflies) or were collected in California (comparison to selected butterflies only). We acquired  
499 preserved specimens from various vendors and collaborators (Table S2). Species-level  
500 identification was generally unambiguous. However, relationships among Neotropical *Junonia*  
501 are not well-resolved and the limited molecular data available do not cleanly support current  
502 designations [36-38]. Two recognized species, *J. evarete* and *J. genoveva*, have large ranges  
503 with extensive overlap and many variable color forms, including both brown and blue. We  
504 therefore described three Neotropical specimens as belonging to the *J. evarete* species  
505 complex to avoid accidental misidentification. Available diagnostic details, including ventral  
506 antenna club color and full collection details, are in Table S2.

507

### 508 *Optical Imaging*

509 Scales were laid on glass slides. Optical images of scales were taken with a Keyence VHX-  
510 5000 digital microscope (500-5000x lens). For refractive index matching, we used immersion oil  
511 (nD=1.56) from Cargille Laboratories (Cedar Grove, New Jersey), and imaged with transmitted  
512 light. Scales were dissected by hand using a capillary microinjection needle. Whole wings were  
513 also imaged on the Keyence VHX-5000, using the 20-200x lens.

514

### 515 *Microspectrophotometry*

516 For reflectance spectra, individual scales were laid flat on a glass slide, with the adwing surface  
517 facing up. We collected spectra of the adwing surface with an Ocean Optics Flame-S-UV-Vis-Es  
518 spectrophotometer mounted on a Zeiss AxioPhot reflected light microscope with a 20x/0.5  
519 objective and a halogen light source. Measurements were normalized to the reflectance of a  
520 diffuse white reference (BaSO<sub>4</sub>). Data were recorded with SpectraSuite 1.0 software with 3  
521 scans to average and a boxcar width of 7 pixels. The software wizard determined optimal  
522 integration time from the reference sample; time was generally about .007 seconds. Spot size  
523 was roughly circular, 310 μm in diameter, and centered on the scale. We processed spectra in  
524 RStudio 1.0.153 with the package 'pavo,' version 0.5-4 [39]. We first smoothed the data using  
525 the *prospec* function with *fixneg* set to zero and *span* set to 0.3. We then normalized the data  
526 using the "minimum" option of the *prospec* function, which subtracts the minimum from each  
527 sample. Because we use a diffuse standard and scales are specular, raw spectra overestimate  
528 reflectance. We therefore followed [8] in dividing spectra by a correction factor. We used a  
529 smaller correction factor of only 2.5, because in our setup the scale does not fill the full field of  
530 view. Absorption spectra from scales submerged in index-matched oil were collected and  
531 processed similarly, but under transmitted light with an integration time of 0.01 seconds, and  
532 without the "minimum" option.

533

### 534 *Helium Ion Microscopy*

535 Surface imaging by HIM provides increased depth of field and enhanced topographic contrast  
536 compared to Scanning Electron Microscopy for a range of biological and other materials [40],  
537 including butterfly wing scales [41]. Samples were prepared for HIM by laying the wing on a  
538 glass slide with the region of interest facing down, wetting with ethanol, and freezing with liquid  
539 nitrogen. We then promptly cross-sectioned the wing through the region of interest with a new  
540 razor blade. After the sample warmed and dried, we used a capillary microinjection needle to  
541 transfer individual cut scales onto carbon tape. Scales were placed overhanging the edge of a  
542 strip of carbon tape, with one end pressed into the tape. We optically imaged the tape strip as a  
543 color reference and then transferred the tape to the vertical edge of a 90° stepped pin stub (Ted  
544 Pella #16177). While non-conductive samples can be imaged by HIM using low energy  
545 electrons for charge neutralization, we found that the unsupported overhanging edges of our  
546 scales tended to bend due to local charging [42]. We thus sputter coated with 4.5 - 13 nm of Au-  
547 Pd using a Cressington 108auto or Pelco SC5. Images (secondary electron) of the sectioned  
548 scales were acquired with a Zeiss ORION NanoFab Helium Ion Microscope using a beam  
549 energy of 25 keV and beam current of 0.8 - 1.8 pA (10 μm aperture, spot size 4). We then used  
550 the line measurement tool in ImageJ software to measure lamina thickness from the  
551 micrographs. We corrected measurements for slight variations in working distance not  
552 accounted for by the software scale bar, using  $T_{\text{correct}} = (T_{\text{raw}})/9058 \mu\text{m} \times d \mu\text{m}$ , where  $d$  is the  
553 measured working distance and 9058 μm is the reference working distance. Thickness of  
554 female *J. westermanni* scales was not measured because specimens were unavailable.

555

556 Even with vertical mounting, the sectioned surface of the scale was not always perfectly  
557 perpendicular to the direction of the imaging beam, largely due to the scales' tendency to curve.  
558 Viewing angle is critical, since measurements taken from a projected image viewed under



559 erroneous tilt could cause systematic underestimation of thickness. We therefore tilted the  
560 microscope stage until the scale lamina was perpendicular at the measurement site, as  
561 diagnosed by observing an inflection point in lamina curvature (i.e. a switch between the upper  
562 and lower surfaces being visible). Thickness was only measured at visible inflection points (Fig.  
563 S3 B-D). We performed a tilt calibration to test the precision of our inflection point criterion and  
564 determined that an inflection point was only visible if the sample was within 4-5° of  
565 perpendicular. Since erroneous tilt is limited to 5°, thickness underestimation is limited to 1 nm.  
566 Slight overestimations are likely, due to the sputter coating.

567  
568 The sectioned scale shown in Fig. 1A was milled using the gallium ion beam of the Zeiss  
569 ORION NanoFab (beam energy 30 keV, beam current 300 pA).

570  
571 *Analyses*

572 Statistical analyses were conducted in R 3.2.2. For Fig. 8 A-B, specimens were grouped  
573 following the largest natural breaks in the data for two metrics, mean thickness and weighted  
574 average reflected wavelength, which were in good agreement.

575  
576 *Modeling film thickness*

577 We modeled the reflectance from chitin thin films as previously described [27], including  
578 integrating reflectance for values of  $\theta$  from zero to the maximal angle of illumination (i.e.  
579 averaging reflectances to simulate the inverted cone of light collected by the objective lens used  
580 in microspectrophotometry, given its numerical aperture). Specifically, since our objective had  
581 NA=0.5, we calculated reflectance over values of  $\theta$  from 0 to 30°, multiplied by  $2\pi\theta$ , and then  
582 averaged over the cumulative circular surface area. For the model with Gaussian thickness  
583 distributions, we followed [15] using  $n=400$  observations from the simulated thickness  
584 distribution.

585  
586 **Acknowledgements**

587 We thank Linlin Zhang and Robert Reed for *optix* mutant wings; Karin van der Burg for *J. coenia*  
588 eggs; Masaki Iwata and Joji Otaki for *J. orithya* wings; and Krushnamegh Kunte for the image of  
589 female *J. hierta*. We thank Edith Smith for fantastic blue buckeyes, information about their  
590 origin, and the image in Fig. 1E. We are indebted to Ryan Null, Bodo Wilts, and Samuel Thayer  
591 for insightful discussions. Erika Anderson, Craig Miller, and Michael Nachman gave helpful  
592 feedback on the manuscript. Helium Ion Microscopy was performed at the Biomolecular  
593 Nanotechnology Center, a core facility of the California Institute for Quantitative Biosciences,  
594 University of California, Berkeley. Funding was provided by a National Science Foundation  
595 Doctoral Dissertation Improvement Grant DEB-1601815 (to R.C.T. and N.H.P.) and a National  
596 Science Foundation Graduate Research Fellowship DGE-1106400 (to R.C.T.).

## References

1. Cuthill, I.C., Allen, W.L., Arbuckle, K., Caspers, B., Chaplin, G., Hauber, M.E., Hill, G.E., Jablonski, N.G., Jiggins, C.D., and Kelber, A. (2017). The biology of color. *Science* *6350*, eaan0221.
2. Parnell, A.J., Bradford, J.E., Curran, E.V., Washington, A.L., Adams, G., Brien, M.N., Burg, S.L., Morochz, C., Fairclough, J.P.A., and Vukusic, P. (2018). Wing scale ultrastructure underlying convergent and divergent iridescent colours in mimetic *Heliconius* butterflies. *Journal of The Royal Society Interface* *141*, 20170948.
3. Matsuoka, Y., and Monteiro, A. (2018). Melanin Pathway Genes Regulate Color and Morphology of Butterfly Wing Scales. *Cell Reports* *1*, 56-65.
4. Brien, M.N., Enciso-Romero, J., Parnell, A.J., Salazar, P.A., Morochz, C., Chalá, D., Bainbridge, H.E., Zinn, T., Curran, E.V., and Nadeau, N.J. (2018). Phenotypic variation in *Heliconius erato* crosses shows that iridescent structural colour is sex-linked and controlled by multiple genes. *Journal of the Royal Society Interface Focus* *1*, 20180047.
5. Ghiradella, H. (1985). Structure and development of iridescent lepidopteran scales: the Papilionidae as a showcase family. *Ann. Entomol. Soc. Am.* *2*, 252-264.
6. Mason, C.W. (1927). Structural colors in insects. II. *J. Phys. Chem.* *3*, 321-354.
7. Yeh, P., Yariv, A., and Cho, A.Y. (1978). Optical surface waves in periodic layered media. *Appl. Phys. Lett.* *2*, 104-105.
8. Stavenga, D.G., Leertouwer, H.L., and Wilts, B.D. (2014). Coloration principles of nymphaline butterflies: Thin films, melanin, ommochromes and wing scale stacking. *Journal of Experimental Biology* *12*, 2171-2180.
9. Wasik, B.R., Liew, S.F., Lilien, D.A., Dinwiddie, A.J., Noh, H., Cao, H., and Monteiro, A. (2014). Artificial selection for structural color on butterfly wings and comparison with natural evolution. *Proceedings of the National Academy of Sciences of the United States* *33*, 12109.
10. Akey, J.M., Ruhe, A.L., Akey, D.T., Wong, A.K., Connelly, C.F., Madeoy, J., Nicholas, T.J., and Neff, M.W. (2010). Tracking footprints of artificial selection in the dog genome. *Proceedings of the National Academy of Sciences* *3*, 1160-1165.
11. Wright, S.I., Bi, I.V., Schroeder, S.G., Yamasaki, M., Doebley, J.F., McMullen, M.D., and Gaut, B.S. (2005). The effects of artificial selection on the maize genome. *Science* *5726*, 1310-1314.
12. Carroll, S.B., Gates, J., Keys, D.N., Paddock, S.W., Panganiban, G.E., Selegue, J.E., and Williams, J.A. (1994). Pattern formation and eyespot determination in butterfly wings. *Science* *5168*, 109-114.
13. Nijhout, H.F. (1980). Ontogeny of the color pattern on the wings of *Precis coenia* (Lepidoptera: Nymphalidae). *Dev. Biol.* *2*, 275-288.
14. Nijhout, H.F., and Koch, P.B. (1991). The distribution of radiolabeled pigment precursors in the wing patterns of nymphalid butterflies. *Journal of Research on the Lepidoptera* *1-2*, 1-13.
15. Siddique, R.H., Vignolini, S., Bartels, C., Wacker, I., and Hölscher, H. (2016). Colour formation on the wings of the butterfly *Hypolimnas salmactis* by scale stacking. *Scientific reports* *1*, 36204.

16. Zhang, L., Mazo-Vargas, A., and Reed, R.D. (2017). Single master regulatory gene coordinates the evolution and development of butterfly color and iridescence. *Proceedings of the National Academy of Sciences* *40*, 10707-10712.
17. Reed, R.D., Papa, R., Martin, A., Hines, H.M., Counterman, B.A., Pardo-Diaz, C., Jiggins, C.D., Chamberlain, N.L., Kronforst, M.R., and Chen, R. (2011). Optix drives the repeated convergent evolution of butterfly wing pattern mimicry. *Science* *6046*, 1137-1141.
18. Nijhout, H.F. (1991). The development and evolution of butterfly wing patterns. *Smithsonian series in comparative evolutionary biology (USA)*
19. Martin, A., McCulloch, K.J., Patel, N.H., Briscoe, A.D., Gilbert, L.E., and Reed, R.D. (2014). Multiple recent co-options of Optix associated with novel traits in adaptive butterfly wing radiations. *EvoDevo* *1*, 7.
20. Wilts, B.D., Pirih, P., and Stavenga, D.G. (2011). Spectral reflectance properties of iridescent pierid butterfly wings. *Journal of Comparative Physiology A* *6*, 693-702.
21. Wilts, B.D., Vey, A.J., Briscoe, A.D., and Stavenga, D.G. (2017). Longwing (*Heliconius*) butterflies combine a restricted set of pigmentary and structural coloration mechanisms. *BMC evolutionary biology* *1*, 226.
22. Kodandaramaiah, U. (2009). Eyespot evolution: phylogenetic insights from *Junonia* and related butterfly genera (Nymphalidae: Junoniini). *Evol. Dev.* *5*, 489-497.
23. Shevtsova, E., Hansson, C., Janzen, D.H., and Kjærandsen, J. (2011). Stable structural color patterns displayed on transparent insect wings. *Proceedings of the National Academy of Sciences* *2*, 668-673.
24. Vukusic, P., Kelly, R., and Hooper, I. (2009). A biological sub-micron thickness optical broadband reflector characterized using both light and microwaves. *Journal of the Royal Society Interface Suppl* *2*, S19-S201.
25. Fresnel, A.J. (1834). *Mémoire sur la loi des modifications que la réflexion imprime a la lumière polarisée* (Paris: De l'Imprimerie de Firmin Didot Frères ...).
26. Vukusic, P., Sambles, J.R., Lawrence, C.R., and Wootton, R.J. (1999). Quantified interference and diffraction in single *Morpho* butterfly scales. *Proceedings of the Royal Society of London B: Biological Sciences* *1427*, 1403-1411.
27. Stavenga, D.G. (2014). Thin Film and Multilayer Optics Cause Structural Colors of Many Insects and Birds. *Materials Today: Proceedings* 109-121.
28. Trzeciak, T.M., Wilts, B.D., Stavenga, D.G., and Vukusic, P. (2012). Variable multilayer reflection together with long-pass filtering pigment determines the wing coloration of papilionid butterflies of the nireus group. *Optics express* *8*, 8877-8890.
29. Ghiradella, H. (1991). Light and color on the wing: structural colors in butterflies and moths. *Applied optics* *24*, 3492.
30. Stavenga, D.G., Leertouwer, H.L., Meglič, A., Drašlar, K., Wehling, M.F., Pirih, P., and Belušič, G. (2018). Classical lepidopteran wing scale colouration in the giant butterfly-moth. *PeerJ* e4590.

31. Giraldo, M.A., and Stavenga, D.G. (2016). Brilliant iridescence of Morpho butterfly wing scales is due to both a thin film lower lamina and a multilayered upper lamina. *Journal of Comparative Physiology A* 5, 381-388.
32. Stoddard, M.C., and Prum, R.O. (2011). How colorful are birds? Evolution of the avian plumage color gamut. *Behav. Ecol.* 5, 1042-1052.
33. Magkiriadou, S., Park, J., Kim, Y., and Manoharan, V.N. (2014). Absence of red structural color in photonic glasses, bird feathers, and certain beetles. *Physical Review E* 6, 062302.
34. Niklas Wahlberg, Julien Leneuve, Ullasa Kodandaramaiah, Carlos Peña, Sören Nylin, André V. L. Freitas, and Andrew V. Z. Brower. (2009). Nymphalid butterflies diversify following near demise at the Cretaceous/Tertiary boundary. *Proceedings of the Royal Society B: Biological Sciences* 167, 4295-4302.
35. Nijhout, H.F. (1980). Pattern formation on lepidopteran wings: determination of an eyespot. *Dev. Biol.* 2, 267-274.
36. Neild, A.F., and D'Abrera, B. (2008). *The butterflies of Venezuela Meridian*.
37. Pfeiler, E., Johnson, S., and Markow, T.A. (2012). DNA barcodes and insights into the relationships and systematics of buckeye butterflies (Nymphalidae: Nymphalinae: Junonia) from the Americas. *The Journal of the Lepidopterists' Society* 4, 185-198.
38. Gemmell, A.P., Borchers, T.E., and Marcus, J.M. (2014). Molecular population structure of Junonia butterflies from French Guiana, Guadeloupe, and Martinique. *Psyche: A Journal of Entomology*
39. Maia, R., Eliason, C.M., Bitton, P., Doucet, S.M., Shawkey, M.D., and Tatem, A. (2013). pavo: an R package for the analysis, visualization and organization of spectral data. *Methods in Ecology and Evolution* 10, 906-913.
40. Joens, M.S., Huynh, C., Kasuboski, J.M., Ferranti, D., Sigal, Y.J., Zeitvogel, F., Obst, M., Burkhardt, C.J., Curran, K.P., and Chalasani, S.H. (2013). Helium Ion Microscopy (HIM) for the imaging of biological samples at sub-nanometer resolution. *Scientific reports* 3514.
41. Boden, S.A., Asadollahbaik, A., Rutt, H.N., and Bagnall, D.M. (2012). Helium ion microscopy of Lepidoptera scales. *Scanning* 2, 107-120.
42. Allen, F.I., Velez, N.R., Thayer, R.C., Patel, N.H., Jones, M.A., Meyers, G.F., and Minor, A.M. (2019). Gallium, neon and helium focused ion beam milling of thin films demonstrated for polymeric materials: study of implantation artifacts. *Nanoscale* 3, 1403-1409.

## 1 Figure Legends

2 **Figure 1:** The lamina of a typical butterfly scale functions as a thin film reflector. (A) Colorized  
3 helium ion micrograph of a nymphaline scale, with a window milled using a gallium focused ion  
4 beam. Inset at higher magnification, with labels for general architectural components of a scale  
5 (R = ridges, r = cross-ribs, L = lamina). (B) Diagram of reflection and refraction in a chitin thin  
6 film. White light enters, reflections are produced at each surface of the film, and reflections of  
7 select wavelengths remain in phase as a function of film thickness (T). (C) Experimental  
8 disruptions of wing color are associated with altered lamina thickness. In *J. coenia*, artificial  
9 selection for blue color increased lamina thickness in both cover and ground scales. In *optix*  
10 mosaic knockout mutants, certain wing regions have similar thickness increases. This trend  
11 recapitulates natural variation in *J. evarete*, where blue butterflies have thick laminae relative to  
12 brown individuals. (\*\*\*) =  $p < 1 \times 10^{-7}$ ) Bars show mean thickness, with error bars of one standard  
13 deviation. (D) Wild-type *J. coenia*. (E) Blue artificially selected *J. coenia*. Image by Edith Smith.  
14 (F) *J. evarete*.

15  
16 **Figure 2:** Structure and color of *Junonia* cover scales. (A-D) Artificially selected blue *J. coenia*.  
17 (E-H) Wild-type *J. coenia*. (I-L) *J. evarete*, blue male from Bolivia. (M-P) *J. evarete*, brown male  
18 from Jamaica. (Q-T) *optix* mosaic knockout mutant (mKO) in *J. coenia*. (A,E,I,M,Q) Dorsal  
19 hindwing, red arrowhead indicates the characterized scale's location. (B,F,J,N,R) Scale in the  
20 orientation it would occupy on the wing, showing the abwing surface of the cover scale. Black  
21 scale bars are 25  $\mu\text{m}$ . (B',F',J',N',R') Adwing surface of cover scale, showing the underside of  
22 the lamina. (B'',F'',J'',N'',R'') Dissected scale with arrow showing regions where all ridges and  
23 ribs are removed to expose the bare lamina. The lamina is sufficient to create iridescent blue  
24 and gold structural colors. (B''',F''',J''',N''',R''') Scale immersed in fluid with a refractive index  
25 matched to chitin, thus eliminating reflection to show only pigmentary color. Blue and brown  
26 scales have comparable amounts of a brown pigment. (C,G,K,O,S) Helium ion micrograph of  
27 cross-sectioned scale. Each lamina is colorized, with approximate thickness indicated by an  
28 adjacent red bar (precise measurements were taken at sites chosen as in Methods). White  
29 scale bar is 500 nm and applies to all HIM images. (D,H,L,P,T) Reflection spectra for the adwing  
30 surface of disarticulated scales. Solid line is the mean spectrum, and blue envelope is one  
31 standard deviation; minimum N=6 spectra per graph.

32  
33 **Figure 3:** Absorbance spectra show the effect of artificial selection on scale pigmentation. (A)  
34 Absorbance measures in *J. coenia* wild-type (brown), and artificially selected (blue) cover scales  
35 show that both have comparable pigmentation (Mann-Whitney *U*, Table S1). (B) Absorbance of  
36 selected *J. coenia* ground scales is nearly doubled relative to brown wild-type scales. (C)  
37 Absorbance does not differ between blue and brown *J. evarete* cover scales, and is similar to  
38 pigmentation in *J. coenia* cover scales. Plots show mean spectra with envelope of one standard  
39 deviation, N=6 spectra per sample.

40  
41 **Figure 4:** Structure and color of *J. coenia* ground scales. (A,C,E) Wings with red arrowhead  
42 indicating the region from which scales were sampled. (B,D,F) Scale in abwing orientation, i.e.  
43 ridges facing up. (B',D',F') Scale in adwing orientation, i.e. lamina facing up. (B'',D'',F'') Scale  
44 immersed in fluid with a refractive index matched to chitin, thus eliminating reflection to show



45 only pigmentary color. (A-B") *J. coenia* artificially selected ground scales. (C-D") *J. coenia* wild-  
46 type ground scales. (E-F") *optix* mKO mutant ground scales. Scale bars are 25  $\mu$ m.

47  
48 **Figure 5:** Absorbance spectra show the effect of *optix* knockout on scale pigmentation across  
49 wing pattern elements. All comparisons are between wild-type and mutant regions in the same  
50 mosaic wing. (A) *optix* mutation decreases absorption in cover scales from the main background  
51 region of the dorsal hindwing (Fig. 2Q). (B) Absorbance of ground scales from the dorsal  
52 hindwing (Fig. 4E) is increased in mutant scales. (C) Absorbance increases with *optix* mutation  
53 in ventral hindwing cover scales (Fig. 6A,C). (D) In the dorsal discal bars, (Fig. 6E,G) *optix*  
54 regulates a switch between orange and brown pigment. Plots show mean spectra with envelope  
55 of one standard deviation, N=6 spectra per sample. Differences for all four comparisons are  
56 statistically significant (Mann-Whitney *U*, Table S1).

57  
58 **Figure 6:** Effects of *optix* mutation on structure and color of *J. coenia* cover scales vary by wing  
59 region. (A,C,E,G) Wings with red arrowhead indicating the region from which scales were  
60 sampled. (B,D,F,H) Scale in abwing orientation. (B',D',F',H') Scale in adwing orientation.  
61 (B",D",F",H") Scale immersed in fluid with a refractive index matched to chitin to show only  
62 pigmentary color. (A-B") Mutant cover scales from an *optix* mKO ventral hindwing have  
63 increased melanin. (C-D") Wild-type cover scales from an *optix* mKO ventral hindwing. (E-F")  
64 Mutant cover scales from an *optix* mKO forewing discal bar have lost orange pigment, gained  
65 brown pigment, and increased lamina thickness, resulting in a shift to blue. (G-H") Wild-type  
66 cover scales from the *optix* mKO forewing discal bar have both orange pigment and an orange  
67 lamina structural color. Scale bars are 25  $\mu$ m.

68  
69 **Figure 7:** Lamina structural colors are an important component of overall wing color throughout  
70 *Junonia*. (A) Phylogeny of color variation in *Junonia* (based on [22]). Arrowheads indicate the  
71 color regions sampled for scale characterization. WT = wild-type. AS = artificial selection. mKO  
72 = *optix* mosaic knockout mutant. DS = winter/dry season form. WS = summer/wet season form.  
73 *J. evarete* variants are from different locations. Female *J. hierta* image is © Krushnamegh  
74 Kunte, NCBS. (B,D,F,H,J,L) Dorsal hindwing, arrow indicates the characterized scales' location.  
75 (C,E,G,I,K,M) Abwing surface of cover scale. (C',E',G',I',K',M') Adwing surface of cover scale,  
76 showing lamina color. (C",E",G",I",K",M") Scale immersed in fluid with refractive index matched  
77 to chitin, thus showing only pigmentary color. (B-C") *J. hierta* basal aura scales are  
78 unpigmented and appear blue due to lamina structural color. (D-E") *J. hierta* has coordinated  
79 yellow pigment with a structurally yellow lamina. (F-G") Neutral light grey of *J. atlites* is  
80 exclusively structural, due to additive color mixing of the multicolored lamina. (H-I") Blue scales  
81 of dry season *P. octavia* are structurally colored since no pigment is present. (J-K") Wet season  
82 *P. octavia* has discordant red pigment and blue lamina colors. The red pigment is localized in  
83 the ridges and cross-ribs on the abwing surface of the scale, while blue light from the lower  
84 lamina spills through the windows between them. (L-M") The red band in dry season *P. octavia*  
85 is a more saturated red than in (J), due to the combination of both more red pigment and a  
86 structurally reddish lamina.

87

88 **Figure 8:** Lamina thickness predicts lamina color across the *Junonia* phylogeny. (A) Thickness  
89 measures for the regions indicated in Fig. 7A vary continuously over a 170 nm range (minimum  
90 N=3 scales and 12 measures per specimen). To visualize the relationship between thickness  
91 and color, we clustered similar specimens into five color groups described as gold, red, indigo,  
92 blue, and green. Thickness is significantly different between groups (ANOVA and Tukey's HSD,  
93  $p < 2 \times 10^{-6}$ ). *J. atlites*, which has rainbow color gradients in each individual scale, has especially  
94 variable thickness, with measures overlapping the ranges of all color groups. Boxplots show  
95 median and inner quartiles, whiskers extend to 1.5 times the interquartile range, outliers are  
96 shown as points, and notches show 95% confidence interval of the median. (B) Color groups  
97 are associated with different reflectance profiles. Lines are mean spectra and envelopes show  
98 one standard deviation. N=6 spectra per specimen from panel A; clusters follow panel A. (C-G)  
99 Adwing reflectance spectra for representative individual specimens with increasing lamina  
100 thicknesses. The color sequence follows Newton's series. Solid line is the mean spectrum and  
101 the envelope is one standard deviation; N=3 scales and 6 spectra per graph.

102  
103 **Figure 9:** Absorbance spectra show variable pigment concentrations and identities among  
104 representative *Junonia* butterflies. Spectra were taken from cover scales from the regions  
105 shown in Fig. 7A. (A) *J. hierta* pigmentation varies by wing region (Fig. 7B-E"). (B) Extent of red  
106 pigmentation is the most important driver of color difference between seasonal morphs of *P.*  
107 *octavia* (Fig. 7H-M"). (C) Pigment absorbance differs by sex in *J. orithya*. (D) *J. atlites* scales  
108 lack pigmentation (Fig. 7F-G"). Plots show mean spectra with envelope of one standard  
109 deviation, minimum N=6 spectra per sample.

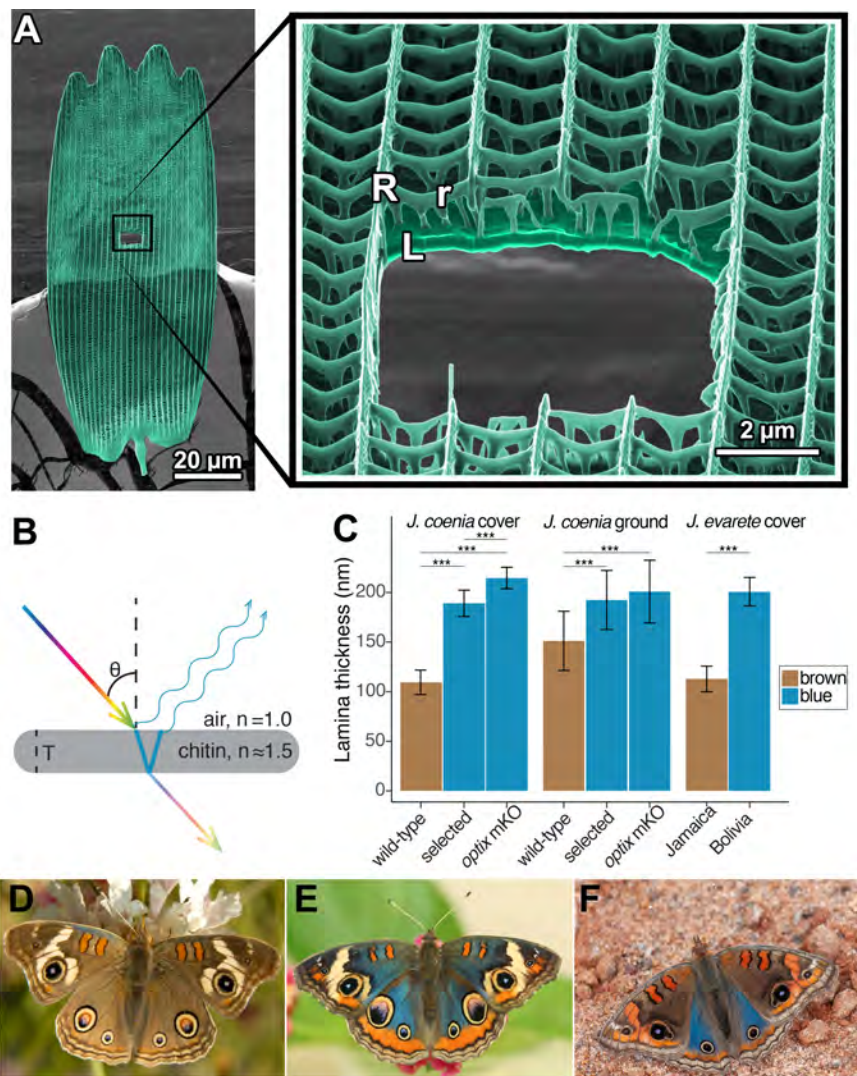

Fig. 1



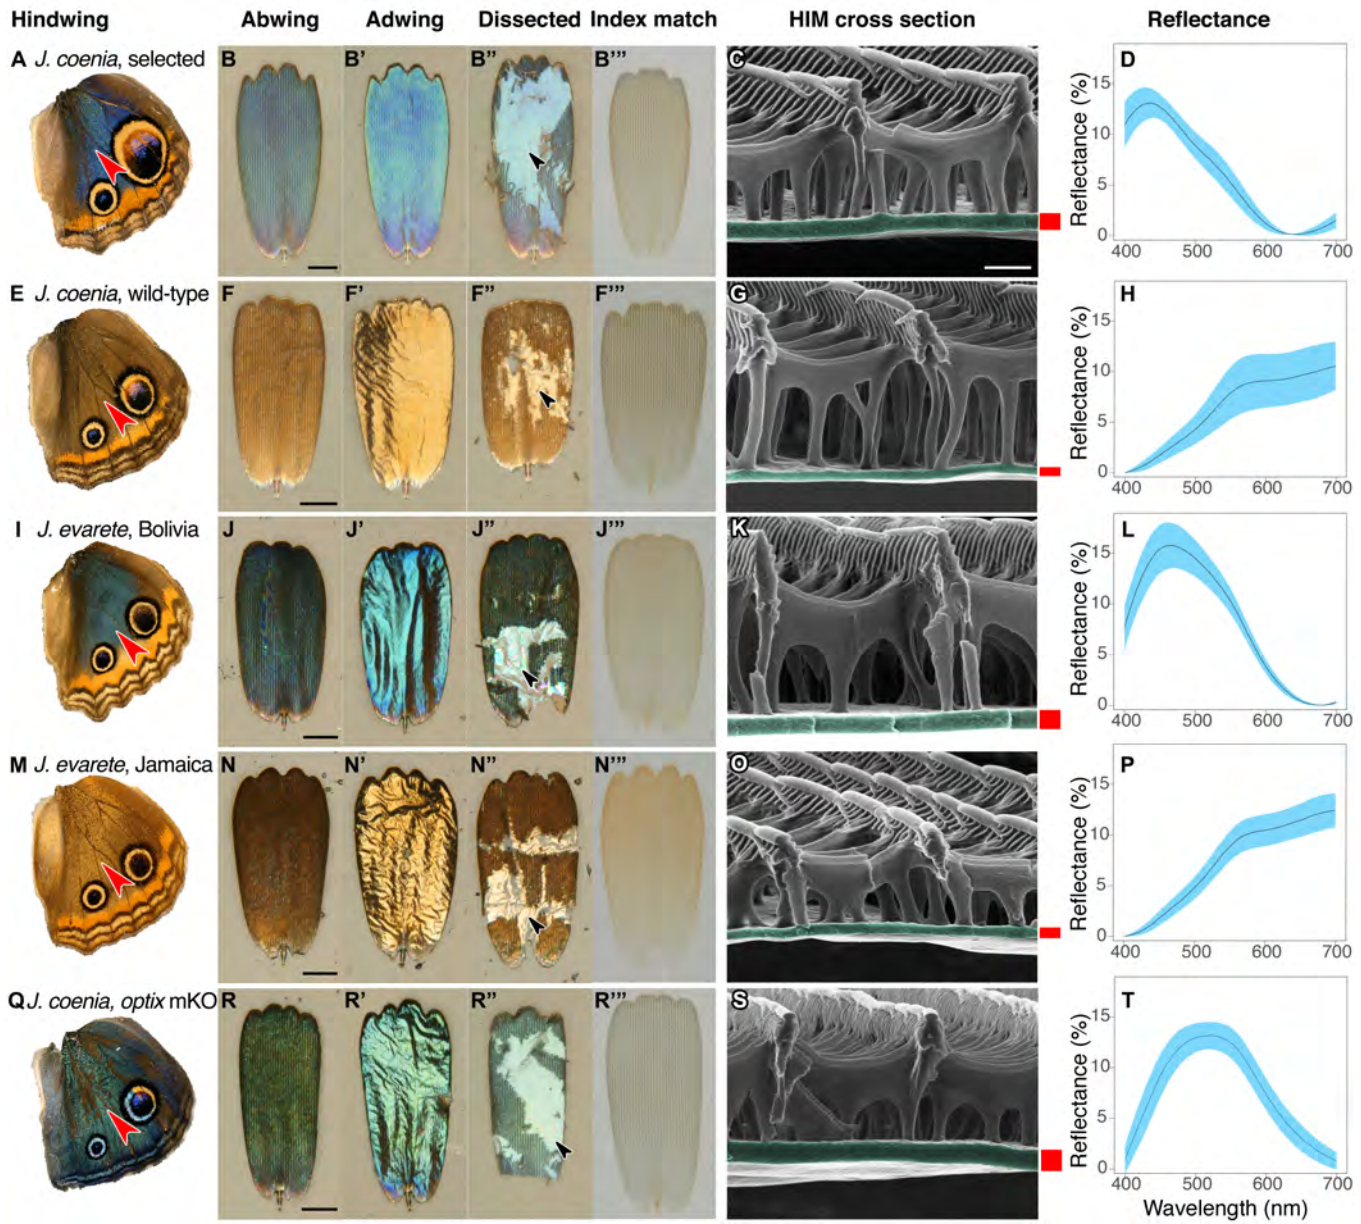

Fig. 2

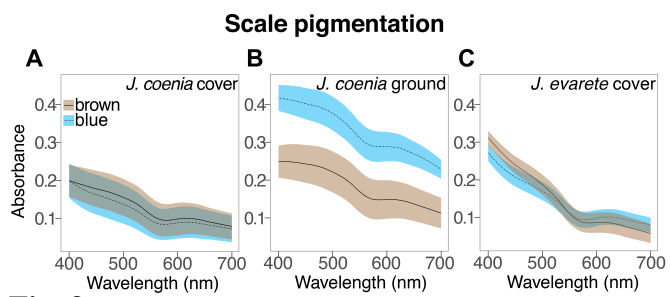

**Fig. 3**



**Ground scales**  
**Specimen**

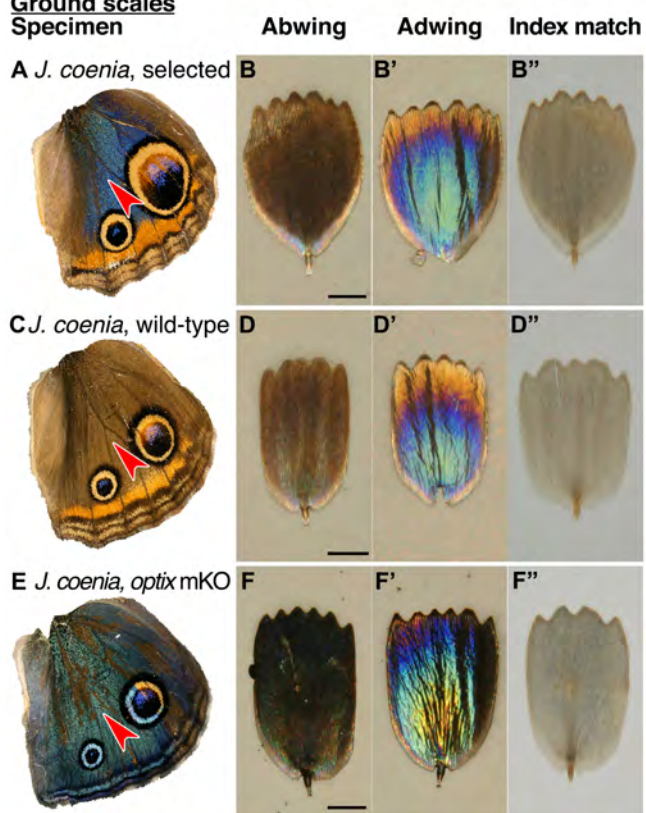

**Fig. 4**

## Pigmentation in *optix* mosaic mutants

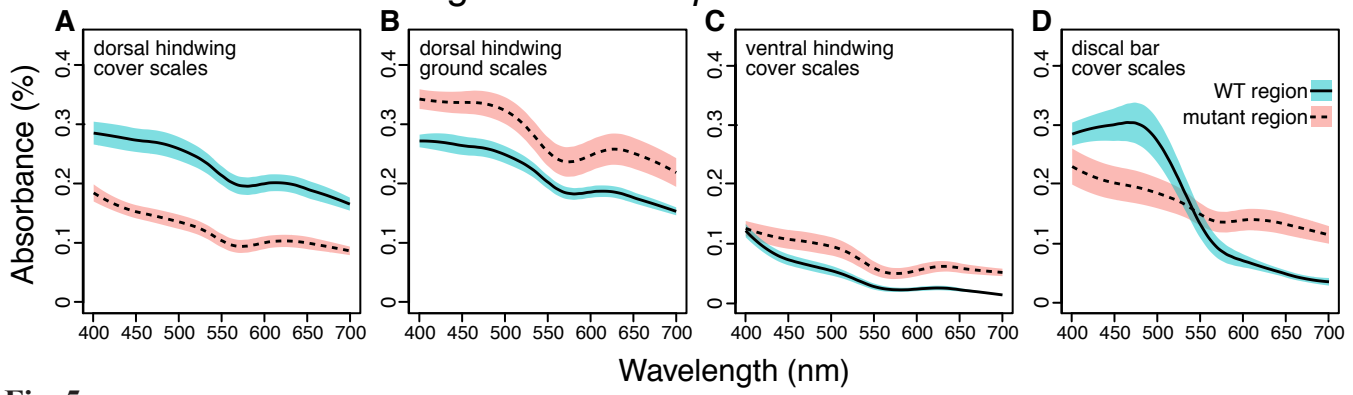

Fig. 5

**Cover scales**

**Specimen**

**Abwing**

**Adwing**

**Index match**

**A** *optix* mKO, mutant

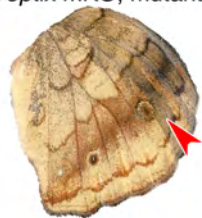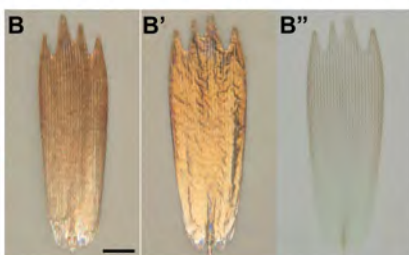

**C** *optix* mKO, wildtype

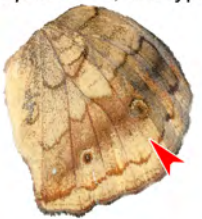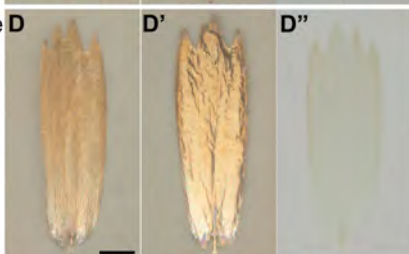

**E** *optix* mKO, mutant

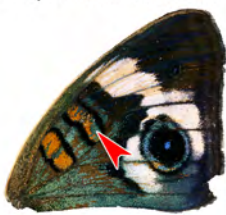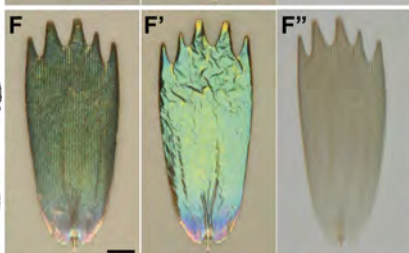

**G** *optix* mKO, wildtype

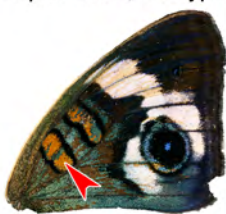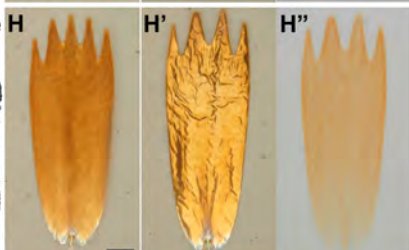

**Fig. 6**

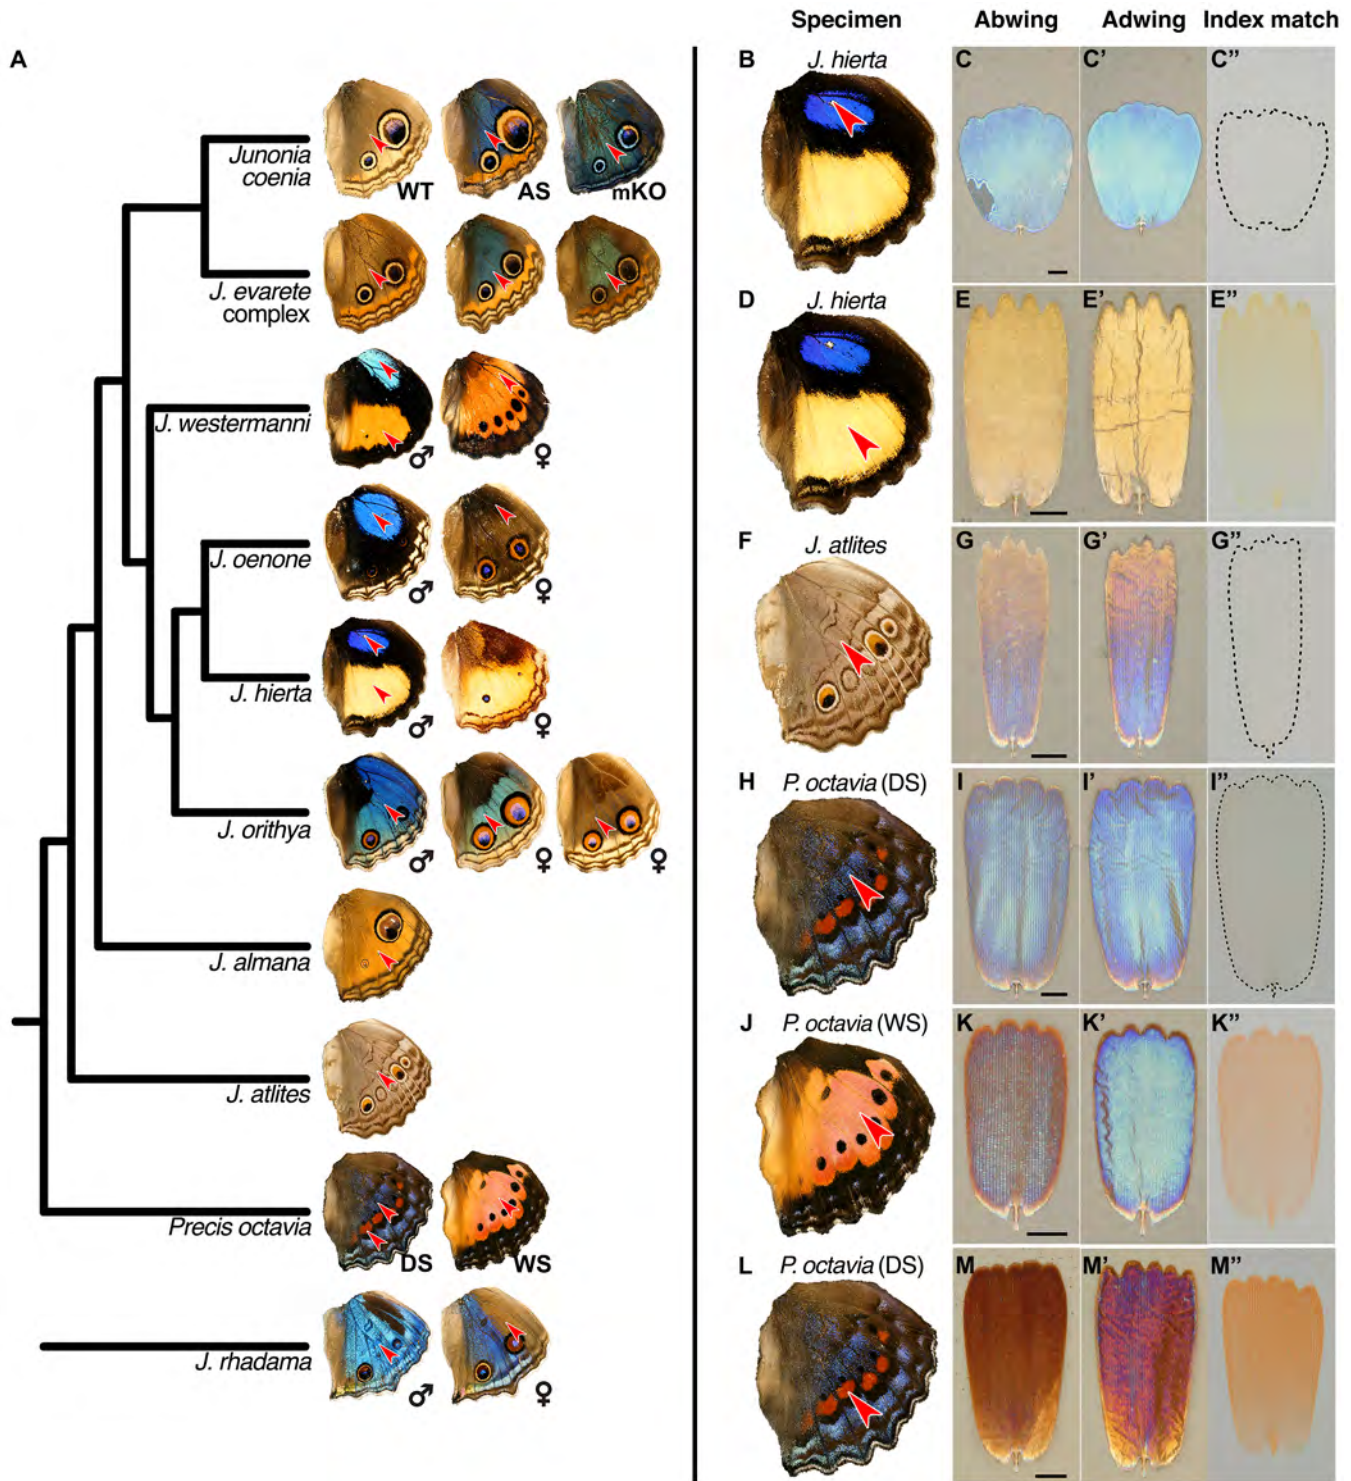

**Fig. 7**

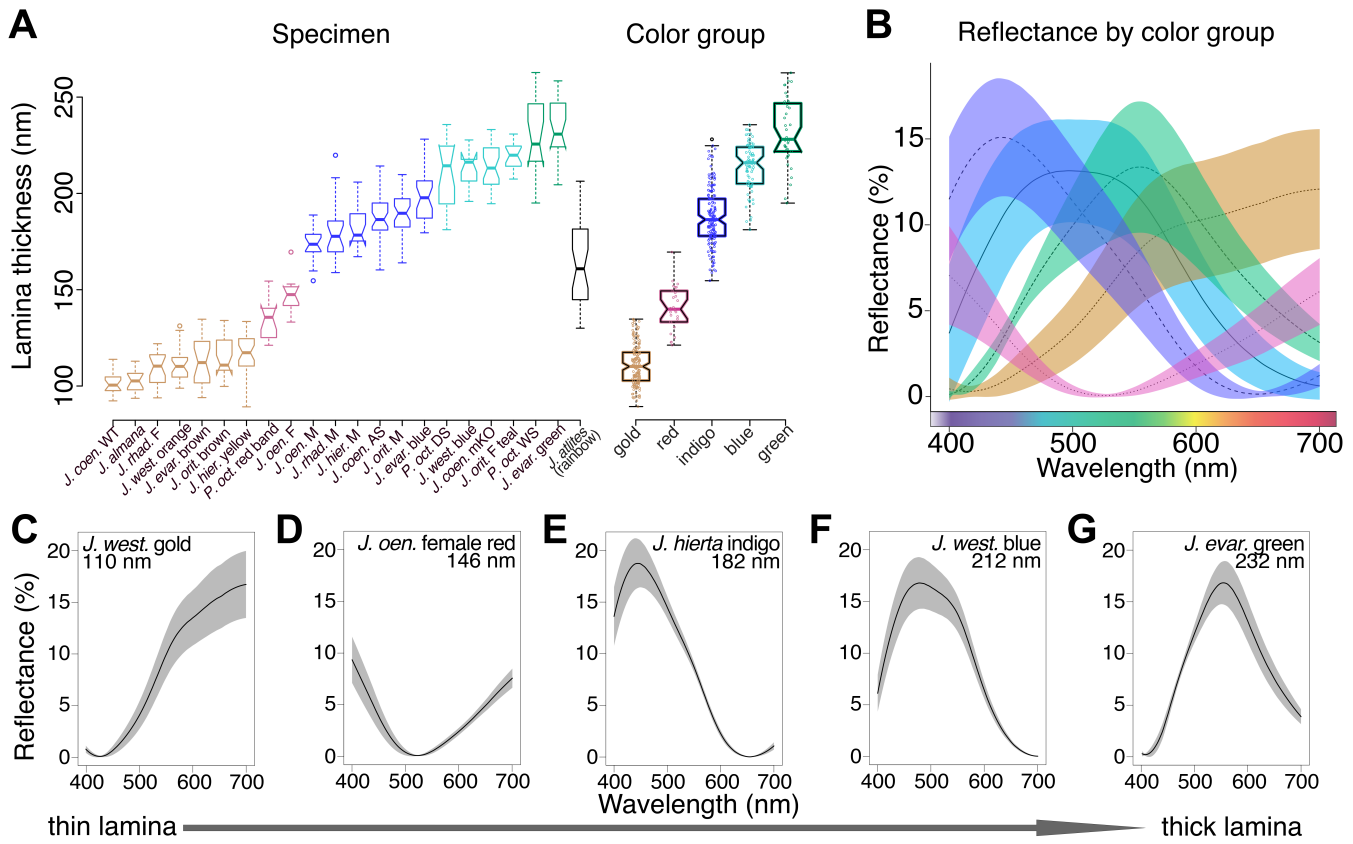

**Fig. 8**



## Pigmentation in cover scales

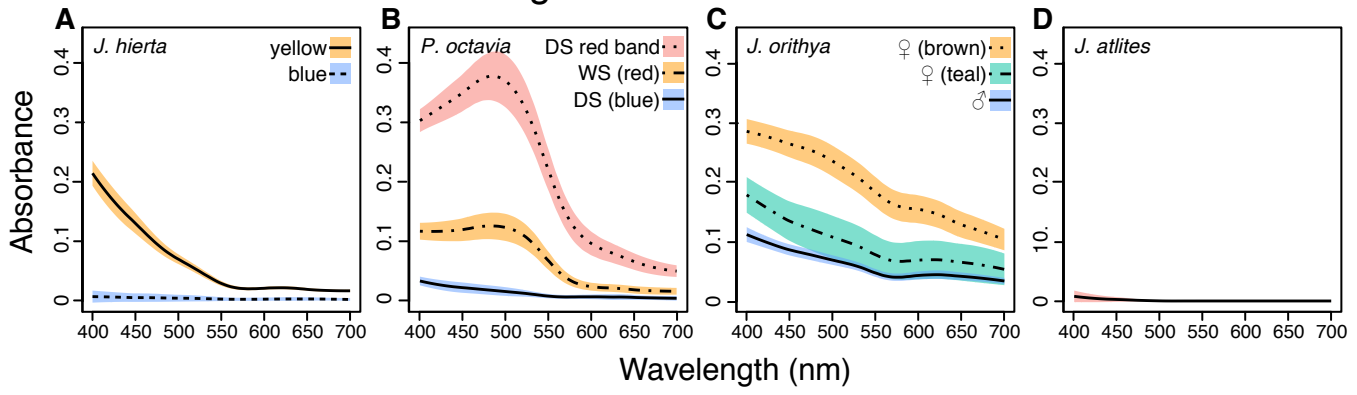

Fig. 9
